# Supplementary material for: Endoscopic ultrasound with tissue acquisition of lymph nodes in patients with potentially resectable intrahepatic cholangiocarcinoma
Source: PubMed Central journal article supplement (PMC11343620; doi:10.1055/a-2366-2592), 2024-08-23
Supplement: 10-1055-a-2366-2592_23693235.pdf.pdf [file 10-1055-a-2366-2592_23693235.pdf.pdf]

## Supplementary material

**Table S1** Patient characteristics for which EUS-TA precluded surgical exploration.

| Patient | Age, sex | ASA | WHO PS | cT stage | Longest tumor axis in mm | Number of tumors | Location in liver | Resection intention | EUS-TA location                         | (Extra) regional | Treatment afterward |
|---------|----------|-----|--------|----------|--------------------------|------------------|-------------------|---------------------|-----------------------------------------|------------------|---------------------|
| 1       | 76, F    | 2   | 0      | 1A       | 20                       | 1                | Left              | S2/3 resection      | Between left gastric and hepatic artery | ER               | pCTx                |
| 2       | 53, F    | 1   | 0      | 1B       | 50                       | 1                | Left              | Hemi                | Celiac trunk + gastrohepatic            | ER               | pCTx/RTx            |
| 3       | 79, M    | 2   | 1      | 1B       | 53                       | 1                | Right             | Hemi                | Periaortic                              | ER               | pCTx                |
| 4       | 60, F    | 2   | 0      | 1B       | 80                       | 1                | Right             | Hemi                | Left gastric artery                     | ER               | pCTx                |
| 5       | 34, F    | 2   | 0      | 2        | 33                       | 1                | Left              | Hemi                | Celiac trunk                            | ER               | pCTx                |
| 6       | 69, F    | 2   | 0      | 2        | 37                       | 2                | Left              | Ext Hemi            | Celiac trunk                            | ER               | pCTx                |
| 7       | 50, F    | 1   | 0      | 2        | 118                      | 1                | Right             | Hemi                | Pericaval                               | ER               | BSC                 |
| 8       | 67, F    | 2   | 0      | 3        | 67                       | 1                | Right             | Hemi                | Periaortic                              | ER               | pCTx                |
| 9       | 76, F    | 3   | 1      | 3        | 37                       | 1                | Right             | Hemi                | Gastroduodenal artery                   | ER               | pCTx                |
| 10      | 61, M    | 1   | 0      | 3        | 45                       | 1                | Left              | Hemi                | Celiac trunk                            | ER               | pCTx                |
| 11      | 75, F    | 2   | 1      | 3        | 53                       | 2                | Right             | Ext Hemi            | Aortocaval                              | ER               | BSC                 |
| 12      | 36, M    | 2   | 1      | 3        | 81                       | 1                | Right             | Ext Hemi            | Esophagus                               | ER               | BSC                 |
| 13      | 73, M    | 1   | 0      | 3        | 136                      | 1                | Right             | Ext Hemi            | Celiac trunk                            | ER               | BSC                 |

## Supplementary material

|    |          |   |   |    |    |   |       |          |                               |   |      |
|----|----------|---|---|----|----|---|-------|----------|-------------------------------|---|------|
| 14 | 61,<br>F | 2 | 1 | 1B | 52 | 1 | Right | Hemi     | Portal vein +<br>periduodenal | R | pCTx |
| 15 | 78,<br>M | 2 | 1 | 2  | 41 | 1 | Right | Hemi     | Hilar                         | R | BSC  |
| 16 | 72,<br>M | 2 | 0 | 3  | 85 | 1 | Right | Hemi     | Hilar                         | R | pCTx |
| 17 | 70,<br>M | 2 | 0 | 3  | 74 | 2 | Right | Ext hemi | Portal vein                   | R | pCTx |

BSC, best supportive care; Ext hemi, extended hemi-hepatectomy; Hemi, hemi-hepatectomy; NR, extraregional; pCTx, palliative chemotherapy; R, regional.
